# Supplementary material for: Human PAPS Synthase Isoforms Are Dynamically Regulated Enzymes with Access to Nucleus and Cytoplasm
Source: PubMed Central journal article supplement (PMC3252339; doi:10.1371/journal.pone.0029559), 2012-01-05
Supplement: pone.0029559.s001.pdf [file pone.0029559.s001.pdf]

# Human PAPS synthase isoforms are dynamically regulated enzymes with access to nucleus and cytoplasm

Running title: Nucleocytoplasmic shuttling of PAPS synthases

Elisabeth Schröder<sup>&</sup>, Lena Gebel<sup>&</sup>, Andrey A. Ereemeev, Jessica Morgner, Daniel Grum, Shirley K. Knauer, Peter Bayer, and Jonathan W. Mueller

<sup>&</sup>Equally contributing authors.

## Supporting Information

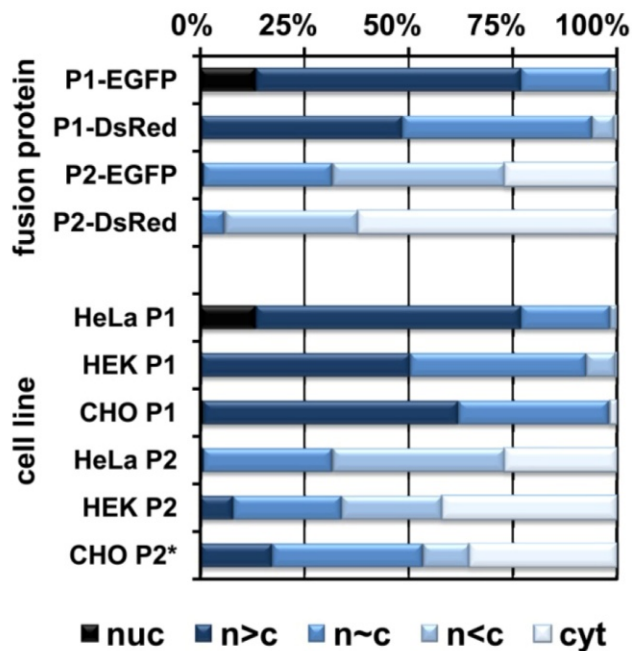

### Supplementary figure 1: Cellular localisation of PAPS synthase proteins.

Localisation of different PAPS synthase fusion proteins in several cell types. The influence of the nature of the fusion protein (expressed in HeLa cells) as well as the cell line used was assayed for PAPSS1 and PAPSS2 fusion proteins. At least 200 cells were scored according to the schematic presented in Figure 1.

\*Localisation of PAPSS2 in CHO cells was scored using a PAPSS2-DsRed fusion protein.

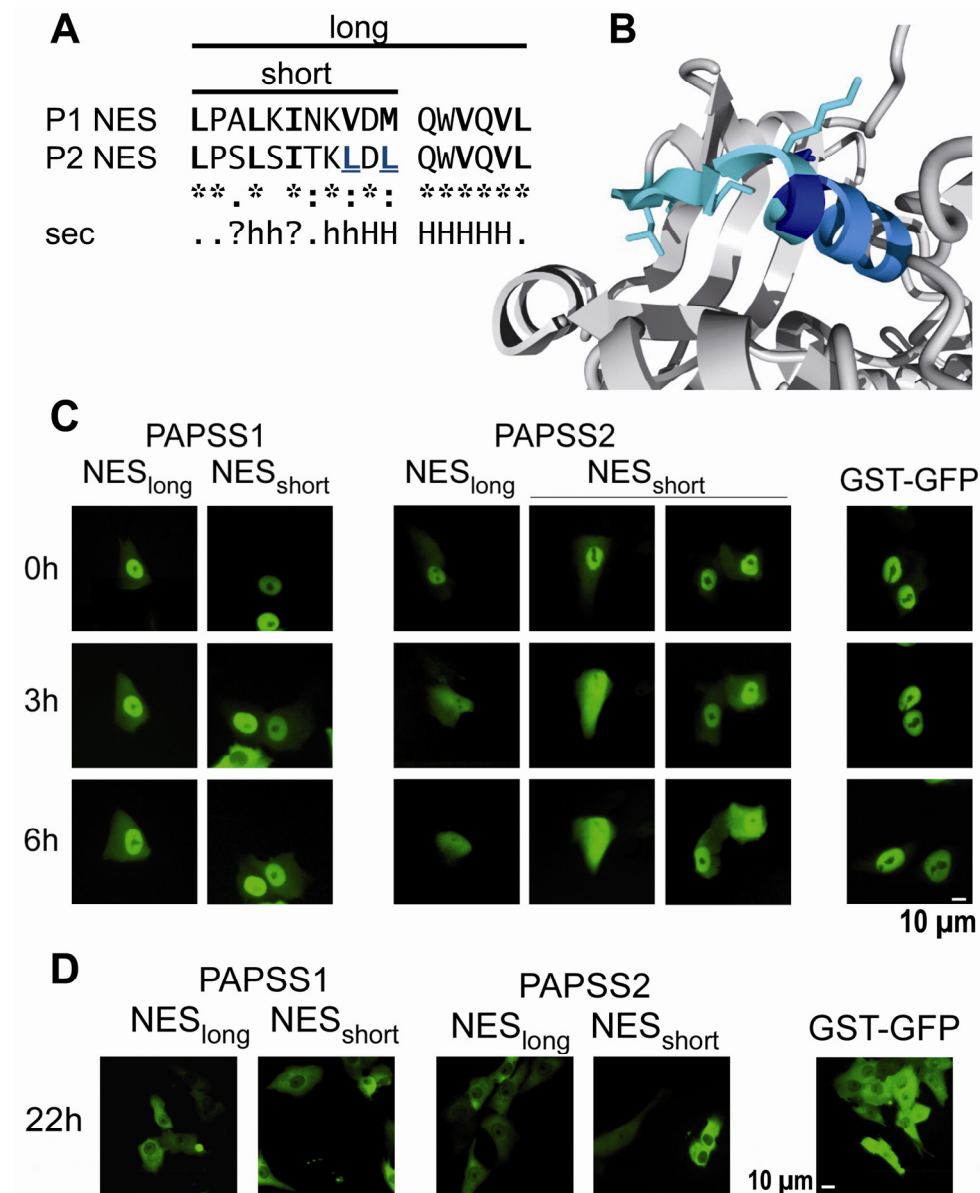

**Supplementary figure 2: PAPS synthases contain a leucine-rich motif that acts as weak NES.**

**A**, alignment of residues Leu254-Leu270 of PAPSS1 (P1) with the respective Leu244-Leu260 sequence of PAPSS2 (P2). The short and long peptidic motifs tested for their nuclear export activity are indicated. Residues of a putative leucine-rich NES are written in bold. NPS secondary structure consensus prediction is shown below the alignment; “.”, coil; h/H, weak/prominent helical propensity; “?” , no prediction. **B**, mapping of this putative leucine-rich export signal on one part of the ATP sulphurylase domain of the PAPSS1 crystal structure 1X6V. The short sequence is surface-exposed and shown in cyan, the extension in blue. **C**, recombinant GST-PAPSS1/2-NES-GFP proteins containing the respective leucine-rich signal sequences showed weak export activity upon microinjection into the nuclei of Vero cells at the indicated time points (left panels). In contrast, the GST-GFP substrate remained nuclear under the same experimental conditions (right panel). Approximately 50 cells were injected, and representative images from live-cell fluorescence microscopy are shown. **D**, due to the slow export kinetics of this motif it was not possible to monitor completion of export within one round of the cell cycle, therefore monitoring included mitotic nuclear envelope breakdown and reassembly.

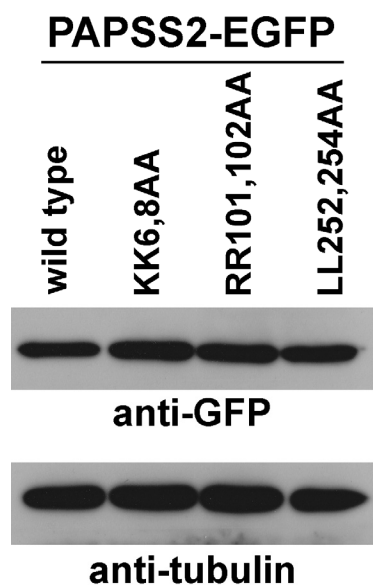

**Supplementary figure 3: Expression levels of PAPSS2-EGFP wild-type and mutant proteins**

Equal amounts of HeLa cells were transfected with wild-type PAPSS2-EGFP expression plasmid as well as those three mutants that showed the largest shifts in cellular localisation: KK6,8AA, RR101,102AA and LL252,254AA and expression levels were assessed by western blotting using an anti-GFP antibody. Equal loading was shown using an anti-tubulin antibody. All four fusion proteins showed similar expression levels at comparable rates of transfection.

## Supplementary table 1: Plasmids used in this study

| Name                 | Encoded construct (including tags)       | Vector             | Restriction sites/primer | Comments                               |
|----------------------|------------------------------------------|--------------------|--------------------------|----------------------------------------|
| wild-type constructs |                                          |                    |                          |                                        |
| pBC828               | PAPSS1-EGFP                              | pEGFP-N1           | NheI/BamHI               |                                        |
| pBC850               | PAPSS2B-EGFP                             | pEGFP-N1           | NheI/BamHI               |                                        |
|                      | GST-His <sub>6</sub> -PreScission-PAPSS1 | pET-41-PreScission | ApaI/EcoRI               | Grum et al., 2010                      |
|                      | PAPSS1-DsRed <sub>mono</sub>             |                    |                          |                                        |
|                      | PAPSS2B- DsRed <sub>mono</sub>           |                    |                          |                                        |
| PAPSS1 point mutants |                                          |                    |                          |                                        |
| pBC889               | KK9,10AA                                 | pBC828             | 827/828                  | NLS                                    |
| pBC859               | RR111,112AA                              | pBC828             | 829/830                  | putative NLS                           |
| pBC885               | KK175,176AA                              | pBC828             | 831/832                  | putative NLS within PAPS loop          |
| pBC886               | RR333,334AA                              | pBC828             | 833/834                  | putative NLS                           |
| pBC860               | R339Q                                    | pBC828             | 835/836                  | different from mouse PAPS synthase (Q) |
| pBC887               | R442A                                    | pBC828             | 837/838                  | putative NLS                           |
| pBC881               | RK592,593AA                              | pBC828             | 843/844                  | putative NLS                           |
| pBC882               | L119K                                    | pBC828             | 720/721                  | interface mutant                       |
|                      |                                          |                    |                          |                                        |
| pBC883               | RR111,112 AA                             |                    | 829/830                  | for bacterial expression               |
|                      | L119K                                    |                    |                          | for bacterial expression               |
| PAPSS2 point mutants |                                          |                    |                          |                                        |
| pBC911               | KK6,8AA                                  | pBC850             | 849/850                  | NLS                                    |
| pBC909               | RR101,102AA                              | pBC850             | 851/852                  | putative NLS                           |
| pBC890               | KR165,166AA                              | pBC850             | 853/854                  | putative NLS in the PAPS loop          |
| pBC891               | II221,224AA                              | pBC850             | 855/856                  | putative NES close to domain linker    |
| pBC910               | LL252,254AA                              | pBC850             | 859/860                  | putative NES different from P1         |
| pBC897               | RR328,329AA                              | pBC850             | 861/862                  | putative NLS                           |

|                             |                                              |           |                     |                                        |
|-----------------------------|----------------------------------------------|-----------|---------------------|----------------------------------------|
| pBC892                      | R334Q                                        | pBC850    | 863/864             | different from mouse P2 (Q)            |
| pBC893                      | L396T                                        | pBC850    | 865/866             | putative NES different from P1         |
| pBC894                      | RR431,432AA                                  | pBC850    | 867/868             | putative NLS different from P1         |
| pBC895                      | R437Ala                                      | pBC850    | 869/870             | putative NLS                           |
| pBC896                      | KK564,565AA                                  | pBC850    | 871/872             | putative NLS                           |
| other constructs            |                                              |           |                     |                                        |
|                             |                                              |           |                     | swapping                               |
| PAPSS1-NES <sub>long</sub>  | LPALKINKVDMQWVQVL                            | pGEX3-GFP | P1NESI5/P1NESI3     | putative NES, for bacterial expression |
| PAPSS1-NES <sub>short</sub> | LPALKINKVDM                                  | pGEX3-GFP | P1NESs5/P1NESs3     | putative NES, for bacterial expression |
| PAPSS2-NES <sub>long</sub>  | LPSLSITKLDLQWVQVL                            | pGEX3-GFP | P2NESI5/P2NESI3     | putative NES, for bacterial expression |
| PAPSS2-NES <sub>short</sub> | LPSLSITKLDL                                  | pGEX3-GFP | P2NESs5/P2NESs3     | putative NES, for bacterial expression |
| PAPSS1-Helix                | SPEDREENVRRIAEVAKLFADAG                      | pGEX3-GFP | P1Hx5/P1Hx3         | putative NES, for bacterial expression |
| PAPSS1-Helix <sub>Mut</sub> | SPEDREENVA <del>AA</del> IAEVAKLFADAG        | pGEX3-GFP | P1HxM5/P1HxM3       | putative NES, for bacterial expression |
| PAPSS1-NLS <sub>long</sub>  | MEIPGSLCKKVKLSNNAQNWGMQ<br>RATNVTYQAHHVSRNKR | pGEX3-GFP | P1NLSI5/P1NLSI3     | putative NLS, for bacterial expression |
| PAPSS1-NLS <sub>short</sub> | MEIPGSLCKKVKLS                               | pGEX3-GFP | P1NLSs5/P1NLSs3     | putative NLS, for bacterial expression |
| mPAPSS2-NLS                 | MSANFKMNHKR                                  | pGEX3-GFP | P2mNLS5/P2mNLS3     | putative NLS, for bacterial expression |
| mPAPSS2-NLS*                | MSGVKKQKT                                    | pGEX3-GFP | P2m*NLS5/P2m*NLS3   | putative NLS, for bacterial expression |
|                             |                                              |           |                     |                                        |
| RevNES                      | LQLPPLERLTL                                  | pGEX3-GFP | 5'RevNES/3'RevNES   | control NES, for bacterial expression  |
| SV40NLS                     | PPKKRKRVEDP                                  | pGEX3-GFP | 5'SV40NLS/3'SV40NLS | control NLS, for bacterial expression  |

**Supplementary table 2: Oligonucleotides used in this study**

| BC No.                                               | Sequence                                                           | Content                                                                               |
|------------------------------------------------------|--------------------------------------------------------------------|---------------------------------------------------------------------------------------|
| 541F                                                 | CAC ACA GCT AGC CAC CAT GGA GAT CCC CGG GAG CCT GTG C              | forward PCR primer for human PAPSS1 with NheI, Kozak and ATG codon                    |
| 542R                                                 | C ATG ATG GGC TTG GTA GGT <u>AAC GTT</u> GGT TGC TCT CTG CAT TCC C | mutagenesis primer for introduction of internal AclI site in PAPSS1                   |
| 587F                                                 | G GGA ATG CAG AGA GCA ACC <u>AAC GTT</u> ACC TAC CAA GCC CAT CAT G |                                                                                       |
| 543R                                                 | CAC ACA GGA TCC GCT TTC TCC AAG GAT TTG TAG TAT TC                 | reverse PCR primer for human PAPSS1 with BamHI site WITHOUT STOP codon                |
| 544R                                                 | CAC ACA GGA TCC TTA AGC TTT CTC CAA GGA TTT GTA GTA TTC            | reverse PCR primer for human PAPSS1 with BamHI site AND STOP codon                    |
| 545F                                                 | CAC ACA GCT AGC CACC ATG TCG GGG ATC AAG AAG CAA AAG               | forward PCR primer for human PAPSS2 with NheI, Kozak and ATG codon                    |
| 546R                                                 | C ATG GTG GGC CTG ATA GAC AAC GTT GGT GGA TTT CTG CTG GTT C        | mutagenesis primer for introduction of internal AclI site in PAPSS2                   |
| 588F                                                 | G AAC CAG CAG AAA TCC ACC AAC GTT GTC TAT CAG GCC CAC CAT G        |                                                                                       |
| 547R                                                 | CACACA GG ATC CCC GTT CTT CTC CAG GGA CCT GTA ATA ATC              | reverse PCR primer for human PAPSS2 with BamHI site, additional Gly but no STOP codon |
| PAPSS1 point mutations for the NLS/NES signal screen |                                                                    |                                                                                       |
| 720F                                                 | TCG CAG AAG TTG CTA AAA AGT TTG CAG ATG CTG GCT TAG                | QC primer PAPSS1_L119K                                                                |
| 721R                                                 | AAG CCA GCA TCT GCA AAC TTT TTA GCA ACT TCT GCG ATG                |                                                                                       |
| 722F                                                 | GTT TGC AGA TGC TGG CAA AGT GTG CAT CAC AAG TTT C                  | QC primer PAPSS1_L125K                                                                |
| 723R                                                 | GAA ACT TGT GAT GCA CAC TTT GCC AGC ATC TGC AAA C                  |                                                                                       |
| 724F                                                 | GAG CAC AGG AAA GAG TGG CGC TGT GCC AGA C                          | QC primer PAPSS1_E350W                                                                |
| 725R                                                 | GTC TGG CAC AGC GCC ACT CTT TCC TGT GCT C                          |                                                                                       |
| 827F                                                 | CCC GGG AGC CTG TGC GCC GCA GTC AAA CTG AGC AAT AAC GCG            | QC primer PAPSS1_KK9,10AA                                                             |
| 828R                                                 | CGC GTT ATT GCT CAG TTT GAC TGC GGC GCA CAG GCT CCC GGG            |                                                                                       |
| 829F                                                 | GAC AGA GAA GAG AAT GTT GCA GCC ATC GCA GAA GTT GCT AAA CTG        | QC primer PAPSS1_RR111,112AA                                                          |
| 830R                                                 | T AGC AAC TTC TGC GAT GGC TGC AAC ATT CTC TTC TCT GTC TTC AGG      |                                                                                       |
| 831F                                                 | GAT GTC AAA GGA CTC TAC GCA GCA GCC CGG GCA GGA GAA ATT AAA G      | QC primer PAPSS1_KK175,176AA                                                          |
| 832R                                                 | C TCC TGC CCG GGC TGC TGC GTA GAG TCC TTT GAC ATC CCT C            |                                                                                       |
| 833F                                                 | GCT CTG ATG TAT GAG GGC GCC GCT GTG GCC ATT CTT CGC AAT CC         | QC primer PAPSS1_RR333,334AA                                                          |
| 834R                                                 | GCG AAG AAT GGC CAC AGC GGC GCC CTC ATA CAT CAG AGC AAA TG         |                                                                                       |

|                                                      |                                                                       |                                                                                   |
|------------------------------------------------------|-----------------------------------------------------------------------|-----------------------------------------------------------------------------------|
| 835F                                                 | CGC CGT GTG GCC ATT CTT CAG AAT CCA GAG TTT TTT GAG CAC AGG           | QC primer PAPSS1_R339Q                                                            |
| 836R                                                 | CCT GTG CTC AAA AAA CTC TGG ATT CTG AAG AAT GGC CAC ACG GCG           |                                                                                   |
| 837F                                                 | CC CAT AAG CAA CTT CTA GAG GCC GGC TAC CGG CGC CCT G                  | QC primer PAPSS1_R442A                                                            |
| 838R                                                 | C AGG GCG CCG GTA GCC GGC CTC TAG AAG TTG CTT ATG GGT ATC             |                                                                                   |
| 839F                                                 | CAA CTT CTA GAG AGG GGC TAC GCC GCC CCT GTC CTC CTC C                 | QC primer PAPSS1_RR445,446AA                                                      |
| 840R                                                 | G GAG GAG GAG GAC AGG GGC GGC GTA GCC CCT CTC TAG AAG TTG             |                                                                                   |
| 841F                                                 | GTT GCA GCT TAC AAC AAG GCA GCC GCC CGT ATG GAC TAC TAT GAC TCT G     | QC primer PAPSS1_KKK568,569,570AAA                                                |
| 842R                                                 | GTC ATA GTA GTC CAT ACG GGC GGC TGC CTT GTT GTA AGC TGC AAC TCG       |                                                                                   |
| 843F                                                 | TT ATT TCA GGA ACA CGA ATG GCC GCA CTT GCT CGA GAA GGC CAG            | QC primer PAPSS1_RK592,593AA                                                      |
| 844R                                                 | GGC CTT CTC GAG CAA GTG CGG CCA TTC GTG TTC CTG AAA TAA ATT CAA AG    |                                                                                   |
| 845F                                                 | G CAG AGA GCA ACC AAT GTC GTC TAC CAA GCC CAT CAT GTC AG              | QC primer PAPSS1_T29V                                                             |
| 846R                                                 | GAC ATG ATG GGC TTG GTA GAC GAC ATT GGT TGC TCT CTG CAT TC            |                                                                                   |
| 847F                                                 | CG GGA AAG ACT ACT GTG AGC TTT GCC TTG GAG GAG TAC CTG                | QC primer PAPSS1_M70F                                                             |
| 848R                                                 | CAG GTA CTC CTC CAA GGC AAA GCT CAC AGT AGT CTT TCC CG                |                                                                                   |
| PAPSS2 point mutations for the NLS/NES signal screen |                                                                       |                                                                                   |
| 849F                                                 | C ATG TCG GGG ATC AAG GCC CAA GCC ACG GAG AAC CAG CAG AAA TC          | QC primer PAPSS2_KK6,8AA in the pEGFP-N1 vector (with part of the Kozak sequence) |
| 850R                                                 | CTG CTG GTT CTC CGT GGC TTG GGC CTT GAT CCC CGA CAT GTGG              |                                                                                   |
| 851F                                                 | G GAC AGA GAG GAA AAT ATC GCC GCC ATT GCT GAG GTG GCT AAG CTG         | QC primer PAPSS2_RR101,102AA                                                      |
| 852R                                                 | CTT AGC CAC CTC AGC AAT GGC GGC GAT ATT TTC CTC TCT GTC CCC           |                                                                                   |
| 853F                                                 | GAC GTA AAA GGC CTC TAT GCA GCC GCC AGA GCT GGG GAG ATT AAA G         | QC primer PAPSS2_KR165,166AA                                                      |
| 854R                                                 | CTC CCC AGC TCT GGC GGC TGC ATA GAG GCC TTT TAC GTC TCT GC            |                                                                                   |
| 855F                                                 | CAT TGT ACC CTA TAC TAT AGC CAA AGA TGC CCA CGA ACT CTT TGT GCC G     | QC primer PAPSS2_II221,224AA                                                      |
| 856R                                                 | GCA CAA AGA GTT CGT GGG CAT CTT TGG CTA TAG TAT AGG GTA CAA TGT TCT G |                                                                                   |
| 857F                                                 | GCT GAA ACT CTC CCT TCA GCA TCA GCT ACT AAG CTG GAT CTC CAG TGG       | QC primer PAPSS2_LI247,249AA                                                      |
| 858R                                                 | CTG GAG ATC CAG CTT AGT AGC TGA TGC TGA AGG GAG AGT TTC AGC CTC       |                                                                                   |
| 859F                                                 | CTT CAT TAT CAA TTA CTA AGG CCG ATG CCC AGT GGG TCC AGG TTT TGA G     | QC primer PAPSS2_LL252,254AA                                                      |
| 860R                                                 | AAC CTG GAC CCA CTG GGC ATC GGC CTT AGT AAT TGA TAA TGA AGG GAG AG    |                                                                                   |
| 861F                                                 | GTC CTG GCA CAT GGT GGA GCC GCC GTA GCT ATC TTA CGA GAC GCT G         | QC primer PAPSS2_RR328,329AA                                                      |
| 862R                                                 | C AGC GTC TCG TAA GAT AGC TAC GGC GGC TCC ACC ATG TGC CAG GAC         |                                                                                   |
| 863F                                                 | GA CGG AGG GTA GCT ATC TTA CAA GAC GCT GAA TTC TAT GAA CAC AG         | QC primer PAPSS2_R334Q                                                            |
| 864R                                                 | CT GTG TTC ATA GAA TTC AGC GTC TTG TAA GAT AGC TAC CCT CCG TC         |                                                                                   |

|                                                                     |                                                                                                           |                                                                               |
|---------------------------------------------------------------------|-----------------------------------------------------------------------------------------------------------|-------------------------------------------------------------------------------|
| 865F                                                                | TAC CGT CTG ACA CCT ACC GAG CTC AAA CAG AAA TGT AAA GAA ATG                                               | QC primer PAPSS2_L396T                                                        |
| 866R                                                                | C TTT ACA TTT CTG TTT GAG CTC GGT AGG TGT CAG ACG GTA TTG GTC                                             |                                                                               |
| 867F                                                                | CC CTG TTG ATG CAG GAC ACT GCC GCC AGG CTC CTA GAG AGG GG                                                 | QC primer PAPSS2_RR431,432AA                                                  |
| 868R                                                                | CC CCT CTC TAG GAG CCT GGC GGC AGT GTC CTG CAT CAA CAG GG                                                 |                                                                               |
| 869F                                                                | GC CGC AGG CTC CTA GAG GCC GGC TAC AAG CAC CCG GTC                                                        | QC primer PAPSS2_R437A                                                        |
| 870R                                                                | GAC CGG GTG CTT GTA GCC GGC CTC TAG GAG CCT GCG GC                                                        |                                                                               |
| 871F                                                                | CT GCC TAC AAC AAA GCC GCA GCA GCC ATG GAC TTC TAT GAT CCA G                                              | QC primer PAPSS2_KK564,565AA                                                  |
| 872R                                                                | G ATC ATA GAA GTC CAT GGC TGC TGC GGC TTT GTT GTA GGC AGC CAC                                             |                                                                               |
| 873F                                                                | C TTC ATC TCA GGA ACT CGA ATG GCC GCC CTC GCC CGG GAA GGA G                                               | QC primer PAPSS2_RK587,588AA                                                  |
| 874R                                                                | C TCC TTC CCG GGC GAG GGC GGC CAT TCG AGT TCC TGA GAT GAA G                                               |                                                                               |
| 875F                                                                | C CAG CAG AAA TCC ACC AAT GTA AAC TAT CAG GCC CAC CAT GTG AG                                              | QC primer PAPSS2_V19N                                                         |
| 876R                                                                | CT CAC ATG GTG GGC CTG ATA GTT TAC ATT GGT GGA TTT CTG CTG G                                              |                                                                               |
| 877F                                                                | GGT GCT GGA AAA ACA ACG ATA AGT ATG GCC CTG GAG GAG TAC CTT G                                             | QC primer PAPSS2_F60M                                                         |
| 878R                                                                | C AAG GTA CTC CTC CAG GGC CAT ACT TAT CGT TGT TTT TCC AGC ACC                                             |                                                                               |
| 913F                                                                | C CAG CAG AAA TCC ACC AAT GTA ACC TAT CAG GCC CAC CAT GTG AG                                              | QC primer PAPSS2_V19T                                                         |
| 914R                                                                | CT CAC ATG GTG GGC CTG ATA GGT TAC ATT GGT GGA TTT CTG CTG G                                              |                                                                               |
| Oligonucleotides for GST-signal-peptide-GFP fusions in pGEX vectors |                                                                                                           |                                                                               |
| P2NESS5                                                             | GAT CCA CCT CCC TTC ATT ATC AAT TAC TAA GCT GGA TCT CG                                                    | for insertion of PAPSS2-NES <sub>short</sub> into pGEX-GST-GFP via BamHI/NheI |
| P2NESS3                                                             | CTA GCG AGA TCC AGC TTA GTA ATT GAT AAT GAA GGG AGG TG                                                    |                                                                               |
| P2NESI5                                                             | GAT CCA CCT CCC TTC ATT ATC AAT TAC TAA GCT GGA TCT CCA GTG GGT CCA<br>GGT TTT GG                         | for insertion of PAPSS2-NES <sub>long</sub> into pGEX-GST-GFP via BamHI/NheI  |
| P2NESI3                                                             | CTA GCC AAA ACC TGG ACC CAC TGG AGA TCC AGC TTA GTA ATT GAT AAT GAA<br>GGG AGG TG                         |                                                                               |
| P1NESS5                                                             | GAT CCA CTT ACC AGC ACT GAA AAT TAA TAA AGT GGA TAT GG                                                    | for insertion of PAPSS1-NES <sub>short</sub> into pGEX-GST-GFP via BamHI/NheI |
| P1NESS3                                                             | CTA GCC ATA TCC ACT TTA TTA ATT TTC AGT GCT GGT AAG TG                                                    |                                                                               |
| P1NESI5                                                             | GAT CCA CTT ACC AGC ACT GAA AAT TAA TAA AGT GGA TAT GCA GTG GGT GCA<br>GGT TTT GG                         | for insertion of PAPSS1-NES <sub>long</sub> into pGEX-GST-GFP via BamHI/NheI  |
| P1NESI3                                                             | CTA GCC AAA ACC TGC ACC CAC TGC ATA TCC ACT TTA TTA ATT TTC AGT GCT<br>GGT AAG TG                         |                                                                               |
| P1Hx5                                                               | GAT CCA CAG TCC TGA AGA CAG AGA AGA GAA TGT TCG ACG CAT CGC AGA AGT<br>TGC TAA ACT GTT TGC AGA TGC TGG CG | for insertion of PAPSS1-Helix into pGEX-GST-GFP via BamHI/NheI                |
| P1Hx3                                                               | CTA GCG CCA GCA TCT GCA AAC AGT TTA GCA ACT TCT GCG ATG CGT CGA ACA<br>TTC TCT TCT CTG TCT TCA GGA CTG TG |                                                                               |



|           |                                                                                                           |                                                                                                           |
|-----------|-----------------------------------------------------------------------------------------------------------|-----------------------------------------------------------------------------------------------------------|
| P1HxM5    | GAT CCA CAG TCC TGA AGA CAG AGA AGA GAA TGT TGC CGC TAT CGC AGA AGT<br>TGC TAA ACT GTT TGC AGA TGC TGG CG | for insertion of PAPSS1-Helix <sub>Mut</sub> into pGEX-GST-GFP via BamHI/NheI                             |
| P1HxM3    | CTA GCG CCA GCA TCT GCA AAC AGT TTA GCA ACT TCT GCG ATA GCG GCA ACA<br>TTC TCT TCT CTG TCT TCA GGA CTG TG |                                                                                                           |
| P1NLSI5   | TTT GGA TCC ACA TGG AGA TCC CCG GGA GC                                                                    | for insertion of PAPSS1- NLS <sub>long</sub> into pGEX-GST-GFP via BamHI/NheI following PCR amplification |
| P1NLSI3   | AAA GCT AGC TCT CTT GTT CCT GCT GAC                                                                       |                                                                                                           |
| P1NLSs5   | GAT CCA CAT GGA GAT CCC CGG GAG CCT GTG CAA GAA AGT CAA ACT GAG CG                                        | for insertion of PAPSS1- NLS <sub>short</sub> into pGEX-GST-GFP via BamHI/NheI                            |
| P1NLSs3   | CTA GCG CTC AGT TTG ACT TTC TTG CAC AGG CTC CCG GGG ATC TCC ATG TG                                        |                                                                                                           |
| P2mNLS5   | GAT CCA CAT GTC TGC AAA TTT CAA AAT GAA CCA TAA AAG AGA CG                                                | for insertion of murine PAPSS2-NLS into pGEX-GST-GFP via BamHI/NheI                                       |
| P2mNLS3   | CTA GCG TCT CTT TTA TGG TTC ATT TTG AAA TTT GCA GAC ATG TG                                                |                                                                                                           |
| P2m*NLS5  | GAT CCA CAT GTC GGG GGT CAA GAA GCA GAA GAC GGA CG                                                        | for insertion of murine isoform PAPSS2-NLS* into pGEX-GST-GFP via BamHI/NheI                              |
| P2m*NLS3  | CTA GCG TCC GTC TTC TGC TTC TTG ACC CCC GAC ATG TG                                                        |                                                                                                           |
| 5'RevNES  | GAT CGA CGG CGG CCT TCA GCT ACC ACC GCT TGA GAG ACT TAC TCT TGG AG                                        | for insertion of HIV1 RevNES into pGEX-GST-GFP via BamHI/NheI                                             |
| 3'RevNES  | CTA GCT CCA AGA GTA AGT CTC TCA AGC GGT GGT AGC TGA AGG CCG CCG TC                                        |                                                                                                           |
| 5'SV40NLS | GAT CGA CGG TAC TCC ACC TAA GAA AAA AAG AAA GGT TGA AGA TCC TGG AG                                        | for insertion of SV40 NLS into pGEX-GST-GFP via BamHI/NheI                                                |
| 3'SV40NLS | CTA GCT CCA GGA TCT TCA ACC TTT CTT TTT TTC TTA GGT GGA GTA CCG TC                                        |                                                                                                           |
